# Supplementary material for: Long-term effect of critical illness after severe paediatric burn injury on cardiac function in adolescent survivors: an observational study
Source: PubMed Central journal article supplement (PMC5865217; doi:10.1016/s2352-4642(17)30122-0), 2017-10-20
Supplement: NIHMS917690-supplement.pdf [file NIHMS917690-supplement.pdf]

**Parameters of acute stay**

**Linear regression**

|                                    |             | EF      |         | E/e'     |         | avcIB   |               |
|------------------------------------|-------------|---------|---------|----------|---------|---------|---------------|
|                                    |             | means   | p value | means    | p value | means   | p value       |
| Sex                                |             |         | 0.209   |          | 0.44    |         | 0.69          |
|                                    | M           | 50.1    |         | 10.1     |         | 22.7    |               |
|                                    | F           | 53.9    |         | 9.38     |         | 21.7    |               |
| Cause of burn                      |             |         | 0.937   |          | 0.0621  |         | 0.314         |
|                                    | Flame       | 51.6    |         | 10.5     |         | 21.3    |               |
|                                    | Scald       | 51      |         | 8.18     |         | 26.4    |               |
|                                    | Electrical  | 53      |         | 7.74     |         | 23.6    |               |
| Acute study drug                   |             |         | 0.933   |          | 0.275   |         | 0.317         |
|                                    | Placebo     | 51      |         | 10.8     |         | 23.3    |               |
|                                    | Oxandrolone | 55.2    |         | 9.8      |         | 23.5    |               |
|                                    | Propranolol | 50.9    |         | 10       |         | 22.3    |               |
|                                    | Other       | 53.2    |         | 6.9      |         | 19      |               |
|                                    |             | slopes  | p value | slopes   | p value | slopes  | p value       |
| Age at burn                        |             | -0.0855 | 0.764   | -0.0886  | 0.34    | -0.0335 | 0.883         |
| Length of hospitalization (days)   |             | -0.0705 | 0.127   | 0.00967  | 0.526   | 0.0805  | <b>0.048</b>  |
| Time postburn (years)              |             | 0.0858  | 0.803   | 0.0248   | 0.825   | 0.383   | 0.179         |
| Burn to admit (days)               |             | 0.134   | 0.502   | -0.0324  | 0.618   | 0.0159  | 0.926         |
|                                    | log         | 2.24    | 0.267   | -0.583   | 0.376   | -2.3    | 0.15          |
| Mechanical ventilation days        |             | -0.0657 | 0.308   | 0.0206   | 0.329   | 0.0867  | 0.0995        |
|                                    | log         | -1.65   | 0.141   | 0.597    | 0.108   | 2.09    | <b>0.0171</b> |
| Number of operations               |             | -0.437  | 0.181   | 0.0452   | 0.674   | 0.613   | 0.0685        |
| Percent TBSA burned                |             | -0.12   | 0.145   | -0.00549 | 0.841   | 0.175   | <b>0.0033</b> |
| Percent TBSA full-thickness burned |             | -0.0686 | 0.274   | 0.000757 | 0.971   | 0.0874  | 0.0589        |
| Baux-score                         |             | -0.0886 | 0.15    | -0.00515 | 0.802   | 0.127   | <b>0.0056</b> |

### Logistic regression

|                                    |             | EF < 50% |         | EF < 40% |              | E/e' > 8 |               | E/e' ≥ 12 |         | avcIB > -15dB |               |
|------------------------------------|-------------|----------|---------|----------|--------------|----------|---------------|-----------|---------|---------------|---------------|
|                                    |             | prob     | p value | prob     | p value      | prob     | p value       | prob      | p value | prob          | p value       |
| Sex                                |             |          | 0.342   |          | 0.37         |          | 0.728         |           | 1       |               | 1             |
|                                    | M           | 0.478    |         | 0.217    |              | 0.652    |               | 0.217     |         | 0.136         |               |
|                                    | F           | 0.312    |         | 0.0625   |              | 0.733    |               | 0.2       |         | 0.125         |               |
| Cause of burn                      |             |          | 0.862   |          | 1            |          | 0.00697       |           | 1       |               | 0.592         |
|                                    | Flame       | 0.379    |         | 0.172    |              | 0.821    |               | 0.214     |         | 0.179         |               |
|                                    | Scald       | 0.6      |         | 0.2      |              | 0.4      |               | 0.2       |         | 0             |               |
|                                    | Electrical  | 0.4      |         | 0        |              | 0.2      |               | 0.2       |         | 0             |               |
| Acute study drug                   |             |          | 0.833   |          | 0.934        |          | 0.151         |           | 1       |               | 0.226         |
|                                    | Placebo     | 0.5      |         | 0.167    |              | 0.833    |               | 0.25      |         | 0.0909        |               |
|                                    | Oxandrolone | 0.25     |         | 0        |              | 0.75     |               | 0.25      |         | 0             |               |
|                                    | Propranolol | 0.389    |         | 0.222    |              | 0.706    |               | 0.235     |         | 0.111         |               |
|                                    | Other       | 0.4      |         | 0        |              | 0.2      |               | 0         |         | 0.4           |               |
|                                    |             | OR       | p value | OR       | p value      | OR       | p value       | OR        | p value | OR            | p value       |
| Age at burn                        |             | 1.13     | 0.15    | 1.14     | 0.134        | 1.11     | 0.308         | 0.988     | 0.895   | 1.17          | 0.242         |
| Length of hospitalization (days)   |             | 1.03     | 0.0666  | 1.02     | 0.174        | 1.02     | 0.174         | 0.996     | 0.788   | 1.01          | 0.289         |
| Time postburn (years)              |             | 0.906    | 0.205   | 0.93     | 0.483        | 0.998    | 0.976         | 1.05      | 0.629   | 1.06          | 0.612         |
| Burn to admit (days)               |             | 0.989    | 0.811   | 0.816    | 0.309        | 0.954    | 0.293         | 0.984     | 0.788   | 1.02          | 0.799         |
|                                    | log         | 0.662    | 0.381   | 0.329    | 0.203        | 0.475    | 0.121         | 0.658     | 0.484   | 0.712         | 0.632         |
| Mechanical ventilation days        |             | 1.03     | 0.142   | 1.01     | 0.648        | 1.17     | 0.0807        | 0.989     | 0.623   | 1.02          | 0.348         |
|                                    | log         | 1.46     | 0.15    | 1.53     | 0.214        | 2.45     | <b>0.0152</b> | 1.12      | 0.708   | 1.5           | 0.271         |
| Number of operations               |             | 1.13     | 0.15    | 1.14     | 0.134        | 1.11     | 0.308         | 0.988     | 0.895   | 1.17          | 0.242         |
| Percent TBSA burned                |             | 1.02     | 0.299   | 1.04     | 0.113        | 1.02     | 0.26          | 0.986     | 0.538   | 1.07          | <b>0.0376</b> |
| Percent TBSA full-thickness burned |             | 1.01     | 0.48    | 1.05     | 0.0551       | 1.01     | 0.408         | 0.998     | 0.926   | 1.03          | 0.14          |
| Baux-score                         |             | 1.01     | 0.389   | 1.03     | 0.0945       | 1.02     | 0.203         | 0.989     | 0.523   | 1.1           | <b>0.0252</b> |
| Sepsis                             |             | 0.64     | 0.7023  | 0.595    | 0.999        | 3.5      | 0.395         | 0.172     | 0.35    | 0.686         | 0.999         |
| Any inotrope administered          |             | 2.71     | 0.285   | 10.83    | <b>0.012</b> | 5.88     | 0.124         | 1.286     | 0.999   | 1.438         | 0.6527        |
| Dobutamine administered            |             | 1.635    | 0.706   | 7.2      | <b>0.037</b> | 11       | <b>0.002</b>  | 1.095     | 0.999   | 2.083         | 0.591         |

EF = ejection fraction. E/e' = ratio of E-wave to e'. avcIB = average calibrated integrated backscatter of septal and posterior LV wall. TBSA = total body surface area. Baux score = patient age + TBSA burned + 17 (if inhalation injury present). Prob: Probability. OR: Odds ratio.

**Supplemental Table 1: Linear and logistic regression of parameters of acute hospitalization**

| Parameters of acute stay                     |      | Linear regression |               |           |         |          |         |
|----------------------------------------------|------|-------------------|---------------|-----------|---------|----------|---------|
|                                              |      | EF                |               | E/e'      |         | avcIB    |         |
|                                              |      | slope             | p value       | slope     | p value | slope    | p value |
| Cortisol ( $\mu\text{g}/24\text{h}$ , Urine) | max  | 0.0114            | 0.103         | -0.00148  | 0.453   | 0.0016   | 0.739   |
|                                              | log  | 3.64              | 0.251         | -0.0891   | 0.92    | 2.03     | 0.336   |
|                                              | mean | 0.015             | 0.221         | -0.00211  | 0.537   | 0.00456  | 0.579   |
|                                              | log  | 2.44              | 0.493         | -0.237    | 0.81    | 2.44     | 0.294   |
| Cortisol (pg/ml, Serum)                      | max  | 0.0705            | 0.501         | 0.021     | 0.737   | 0.0544   | 0.694   |
|                                              | log  | 1.79              | 0.651         | 0.397     | 0.867   | 3.12     | 0.549   |
|                                              | mean | 0.112             | 0.569         | 0.0278    | 0.813   | 0.0458   | 0.87    |
|                                              | log  | 1.96              | 0.689         | 0.0443    | 0.988   | 1.82     | 0.786   |
| NEPI ( $\mu\text{g}/24\text{h}$ , Urine)     | max  | 0.013             | 0.366         | -0.000995 | 0.84    | -0.00968 | 0.317   |
|                                              | log  | 0.366             | 0.866         | -0.198    | 0.789   | -0.564   | 0.698   |
|                                              | mean | 0.0163            | 0.48          | -0.00245  | 0.753   | -0.0104  | 0.503   |
|                                              | log  | -0.078            | 0.972         | -0.324    | 0.671   | -0.266   | 0.861   |
| EPI ( $\mu\text{g}/24\text{h}$ , Urine)      | max  | -0.00534          | 0.184         | 0.000464  | 0.736   | 0.000322 | 0.907   |
|                                              | log  | -1.01             | 0.583         | -0.297    | 0.63    | -1.09    | 0.377   |
|                                              | mean | -0.0157           | 0.121         | 0.00142   | 0.684   | 0.000128 | 0.985   |
|                                              | log  | -1.41             | 0.476         | -0.405    | 0.544   | -1.17    | 0.381   |
| DOPA ( $\mu\text{g}/24\text{h}$ , Urine)     | max  | 0.0181            | 0.111         | -0.0036   | 0.358   | -0.00597 | 0.446   |
|                                              | log  | 3.45              | 0.238         | -0.697    | 0.488   | -0.99    | 0.62    |
|                                              | mean | 0.0216            | 0.208         | -0.00482  | 0.409   | -0.00834 | 0.478   |
|                                              | log  | 2.69              | 0.399         | -0.523    | 0.629   | -1.4     | 0.514   |
| IL-1 $\beta$ (pg/ml)                         | max  | -0.0074           | 0.104         | -0.0019   | 0.19    | -0.00239 | 0.449   |
|                                              | log  | -1.87             | <b>0.0383</b> | -0.18     | 0.545   | -0.556   | 0.382   |
|                                              | mean | -0.0383           | 0.132         | -0.0104   | 0.197   | -0.0121  | 0.49    |
|                                              | log  | -2.34             | 0.0623        | -0.38     | 0.352   | -0.899   | 0.303   |
| IL-2 (pg/ml)                                 | max  | -0.00204          | 0.95          | -0.0168   | 0.0949  | 0.0296   | 0.176   |
|                                              | log  | -1.45             | 0.288         | -0.386    | 0.385   | 1.68     | 0.0666  |
|                                              | mean | -0.0174           | 0.949         | -0.138    | 0.1     | 0.189    | 0.303   |

|               |      |          |        |           |              |           |       |
|---------------|------|----------|--------|-----------|--------------|-----------|-------|
| IL-4 (pg/ml)  | log  | -1.29    | 0.547  | -0.714    | 0.298        | 1.54      | 0.292 |
|               | max  | 0.0105   | 0.145  | 0.00293   | 0.202        | 0.00187   | 0.708 |
|               | log  | 0.573    | 0.628  | -0.0284   | 0.941        | 0.415     | 0.609 |
| IL-5 (pg/ml)  | mean | 0.0626   | 0.146  | 0.0177    | 0.196        | 0.0106    | 0.722 |
|               | log  | 1.65     | 0.341  | -0.0338   | 0.952        | 0.484     | 0.684 |
|               | max  | -0.459   | 0.0763 | -0.076    | 0.363        | -0.108    | 0.549 |
| IL-6 (pg/ml)  | log  | -2.56    | 0.171  | -0.22     | 0.716        | 0.0564    | 0.965 |
|               | mean | -0.591   | 0.507  | -0.393    | 0.156        | -0.364    | 0.548 |
|               | log  | -3.54    | 0.239  | -0.944    | 0.323        | -0.216    | 0.917 |
| IL-7 (pg/ml)  | max  | -0.00067 | 0.183  | -0.000122 | 0.447        | -0.000070 | 0.839 |
|               | log  | -0.619   | 0.641  | 0.173     | 0.683        | 1.4       | 0.11  |
|               | mean | -0.00281 | 0.253  | -0.000494 | 0.527        | -0.00027  | 0.873 |
| IL-8 (pg/ml)  | log  | -0.744   | 0.668  | 0.212     | 0.702        | 1.67      | 0.146 |
|               | max  | 0.0127   | 0.816  | -0.0325   | 0.0517       | -0.0271   | 0.468 |
|               | log  | -0.92    | 0.557  | -0.52     | 0.29         | 0.228     | 0.85  |
| IL-10 (pg/ml) | mean | 0.0661   | 0.59   | -0.0526   | 0.168        | -0.051    | 0.544 |
|               | log  | -0.556   | 0.762  | -0.78     | 0.171        | -0.142    | 0.918 |
|               | max  | -0.00389 | 0.111  | 0.000919  | 0.238        | 0.0018    | 0.29  |
| IL-12 (pg/ml) | log  | -3.07    | 0.104  | 1.07      | 0.0742       | 2.21      | 0.107 |
|               | mean | -0.0141  | 0.162  | 0.0041    | 0.201        | 0.0047    | 0.506 |
|               | log  | -3.37    | 0.147  | 1.45      | <b>0.044</b> | 1.9       | 0.266 |
| IL-13 (pg/ml) | max  | -0.00584 | 0.334  | 0.000335  | 0.862        | -0.000705 | 0.865 |
|               | log  | -1.83    | 0.09   | 0.0211    | 0.952        | 0.316     | 0.681 |
|               | mean | -0.0289  | 0.333  | 0.00133   | 0.889        | -0.00405  | 0.843 |
| IL-13 (pg/ml) | log  | -2.11    | 0.16   | 0.0262    | 0.957        | 0.0719    | 0.945 |
|               | max  | -0.00413 | 0.843  | -0.0108   | 0.0918       | 0.014     | 0.32  |
|               | log  | -1.64    | 0.21   | -0.545    | 0.201        | 0.493     | 0.591 |
| IL-13 (pg/ml) | mean | -0.0313  | 0.823  | -0.0834   | 0.0507       | 0.0791    | 0.402 |
|               | log  | -2.24    | 0.268  | -1.14     | 0.0747       | 0.308     | 0.826 |
|               | max  | 0.0671   | 0.675  | -0.0732   | 0.141        | -0.122    | 0.257 |
| IL-13 (pg/ml) | log  | 0.597    | 0.74   | -0.899    | 0.105        | -1.03     | 0.396 |
|               | mean | 0.474    | 0.126  | -0.0876   | 0.379        | -0.214    | 0.316 |

|                      |      |            |               |           |       |           |       |
|----------------------|------|------------|---------------|-----------|-------|-----------|-------|
| IL-17 (pg/ml)        | log  | 2.47       | 0.332         | -0.99     | 0.217 | -2.39     | 0.162 |
|                      | max  | -0.00584   | 0.334         | 0.000335  | 0.862 | -0.000705 | 0.865 |
|                      | log  | -1.83      | 0.09          | 0.0211    | 0.952 | 0.316     | 0.681 |
| GM-CSF (pg/ml)       | mean | -0.0289    | 0.333         | 0.00133   | 0.889 | -0.00405  | 0.843 |
|                      | log  | -2.11      | 0.16          | 0.0262    | 0.957 | 0.0719    | 0.945 |
|                      | max  | -0.0154    | 0.7           | 0.00264   | 0.837 | 0.0136    | 0.615 |
| INF $\gamma$ (pg/ml) | log  | -0.719     | 0.581         | -0.0381   | 0.93  | 0.968     | 0.299 |
|                      | mean | -0.029     | 0.847         | 0.0206    | 0.669 | 0.0164    | 0.874 |
|                      | log  | -0.998     | 0.536         | 0.0175    | 0.974 | 0.624     | 0.587 |
| TNF $\alpha$ (pg/ml) | max  | -0.0146    | <b>0.0365</b> | -0.0034   | 0.133 | -0.00306  | 0.535 |
|                      | log  | -1.44      | 0.16          | -0.169    | 0.608 | 0.321     | 0.66  |
|                      | mean | -0.0569    | <b>0.0499</b> | -0.0112   | 0.236 | -0.012    | 0.555 |
| G-CSF (pg/ml)        | log  | -2.02      | 0.114         | -0.233    | 0.581 | 0.0109    | 0.991 |
|                      | max  | -0.0249    | <b>0.0454</b> | -0.00589  | 0.142 | -0.00706  | 0.418 |
|                      | log  | -2.1       | 0.0553        | -0.468    | 0.187 | -0.49     | 0.535 |
| MCP-1 (pg/ml)        | mean | -0.0672    | 0.0705        | -0.0147   | 0.218 | -0.0176   | 0.497 |
|                      | log  | -3.53      | <b>0.0113</b> | -0.6      | 0.199 | -0.842    | 0.405 |
|                      | max  | -0.00299   | <b>0.0461</b> | 0.0000668 | 0.892 | 0.000427  | 0.687 |
| MIP-1b (pg/ml)       | log  | -2.25      | 0.0907        | 0.000433  | 0.999 | 1.05      | 0.277 |
|                      | mean | -0.0164    | <b>0.0331</b> | -0.00118  | 0.645 | 0.00138   | 0.802 |
|                      | log  | -2.65      | 0.0808        | -0.0908   | 0.858 | 0.752     | 0.51  |
| DOPA (pg/ml)         | max  | -0.00256   | 0.346         | -0.000782 | 0.362 | 0.00113   | 0.548 |
|                      | log  | -2.18      | 0.27          | -0.45     | 0.476 | 0.969     | 0.492 |
|                      | mean | -0.0000154 | 0.998         | -0.00173  | 0.341 | 0.000231  | 0.954 |
| EPI (pg/ml)          | log  | -0.964     | 0.657         | -0.516    | 0.45  | 0.295     | 0.852 |
|                      | max  | -0.00772   | 0.572         | -0.00226  | 0.6   | -0.00221  | 0.817 |
|                      | log  | -1.32      | 0.537         | -0.147    | 0.829 | 0.52      | 0.749 |
| NEPI (pg/ml)         | mean | -0.011     | 0.712         | -0.000719 | 0.939 | -0.0145   | 0.487 |
|                      | log  | -1.32      | 0.605         | -0.0394   | 0.961 | -0.608    | 0.761 |

EF = ejection fraction. E/e' = ratio of E-wave to e'. avcIB = average calibrated integrated backscatter of septal and posterior LV wall. NEPI = norepinephrine. EPI = epinephrine. DOPA = dopamine. OR = odds ratio.

**Supplemental table 2a: Linear regression of biomarkers during acute hospitalization**

| Parameters of acute stay |      | Logistic regression |         |          |               |          |         |           |         |             |         |
|--------------------------|------|---------------------|---------|----------|---------------|----------|---------|-----------|---------|-------------|---------|
|                          |      | EF < 50%            |         | EF < 40% |               | E/e' > 8 |         | E/e' ≥ 12 |         | avcIB > -15 |         |
|                          |      | OR                  | p value | OR       | p value       | OR       | p value | OR        | p value | OR          | p value |
| Cortisol (µg/24h, Urine) | max  | 0.999               | 0.46    | 0.998    | 0.438         | 0.999    | 0.501   | 0.998     | 0.419   | 1           | 0.358   |
|                          | log  | 0.829               | 0.769   | 0.718    | 0.652         | 1.12     | 0.868   | 0.683     | 0.58    | 4.8         | 0.208   |
|                          | mean | 0.998               | 0.555   | 0.999    | 0.687         | 0.999    | 0.657   | 0.997     | 0.375   | 1           | 0.22    |
| Cortisol (pg/ml, Serum)  | log  | 0.94                | 0.93    | 0.875    | 0.866         | 1.08     | 0.914   | 0.591     | 0.495   | 8.1         | 0.185   |
|                          | max  | 0.972               | 0.511   | 1.02     | 0.742         | 1.01     | 0.778   | 1         | 1       | 0.971       | 0.386   |
|                          | log  | 0.36                | 0.482   | 3.21     | 0.589         | 1.04     | 0.972   | 0.688     | 0.721   | 0.495       | 0.534   |
| NEPI (µg/24h, Urine)     | mean | 0.939               | 0.433   | 1.03     | 0.753         | 1.01     | 0.811   | 0.975     | 0.635   | 0.919       | 0.242   |
|                          | log  | 0.225               | 0.395   | 3.65     | 0.633         | 0.77     | 0.845   | 0.406     | 0.493   | 0.225       | 0.315   |
|                          | max  | 0.997               | 0.398   | 0.998    | 0.568         | 1        | 0.779   | 0.992     | 0.242   | 0.997       | 0.585   |
| EPI (µg/24h, Urine)      | log  | 1.01                | 0.985   | 1.22     | 0.692         | 0.838    | 0.723   | 0.56      | 0.244   | 0.806       | 0.72    |
|                          | mean | 0.995               | 0.386   | 0.996    | 0.544         | 1        | 0.97    | 0.991     | 0.252   | 0.998       | 0.825   |
|                          | log  | 1.04                | 0.938   | 1.14     | 0.799         | 0.735    | 0.561   | 0.583     | 0.277   | 0.98        | 0.974   |
| DOPA (µg/24h, Urine)     | max  | 1                   | 0.392   | 1        | 0.267         | 1.01     | 0.466   | 0.999     | 0.601   | 0.984       | 0.466   |
|                          | log  | 1.23                | 0.572   | 1.17     | 0.696         | 1.48     | 0.454   | 0.504     | 0.218   | 0.599       | 0.469   |
|                          | mean | 1.01                | 0.285   | 1        | 0.283         | 1.01     | 0.651   | 1         | 0.951   | 0.961       | 0.342   |
| IL-1β (pg/ml)            | log  | 1.36                | 0.448   | 1.13     | 0.784         | 1.33     | 0.586   | 0.551     | 0.286   | 0.537       | 0.444   |
|                          | max  | 0.998               | 0.489   | 1        | 0.859         | 0.997    | 0.221   | 0.996     | 0.246   | 0.997       | 0.475   |
|                          | log  | 0.717               | 0.579   | 1.19     | 0.795         | 0.422    | 0.254   | 0.459     | 0.239   | 0.621       | 0.567   |
| IL-2 (pg/ml)             | mean | 0.998               | 0.54    | 0.999    | 0.865         | 0.996    | 0.297   | 0.994     | 0.223   | 0.997       | 0.57    |
|                          | log  | 0.791               | 0.714   | 1.15     | 0.847         | 0.572    | 0.46    | 0.48      | 0.291   | 0.539       | 0.496   |
|                          | max  | 1                   | 0.449   | 1        | 0.11          | 0.998    | 0.148   | 0.981     | 0.561   | 0.871       | 0.33    |
| IL-1β (pg/ml)            | log  | 1.31                | 0.172   | 1.63     | <b>0.0373</b> | 0.851    | 0.393   | 0.861     | 0.527   | 0.549       | 0.239   |
|                          | mean | 1                   | 0.424   | 1.01     | 0.174         | 0.982    | 0.277   | 0.983     | 0.619   | 0.533       | 0.377   |
|                          | log  | 1.44                | 0.191   | 1.75     | 0.0651        | 0.763    | 0.302   | 0.794     | 0.508   | 0.243       | 0.237   |
| IL-2 (pg/ml)             | max  | 0.997               | 0.665   | 1        | 0.834         | 0.989    | 0.332   | 0.959     | 0.377   | 1.02        | 0.384   |
|                          | log  | 1.11                | 0.689   | 1.5      | 0.215         | 0.888    | 0.68    | 0.794     | 0.501   | 1.96        | 0.103   |
|                          | mean | 0.988               | 0.83    | 1.01     | 0.921         | 0.919    | 0.242   | 0.941     | 0.566   | 1.14        | 0.127   |

|               |      |       |        |       |               |       |               |       |       |       |       |
|---------------|------|-------|--------|-------|---------------|-------|---------------|-------|-------|-------|-------|
| IL-4 (pg/ml)  | log  | 1.25  | 0.587  | 1.31  | 0.574         | 0.77  | 0.553         | 0.715 | 0.537 | 2.77  | 0.089 |
|               | max  | 0.988 | 0.516  | 0.997 | 0.746         | 1     | 0.654         | 1     | 0.378 | 1     | 0.897 |
|               | log  | 0.85  | 0.506  | 1.11  | 0.704         | 0.833 | 0.449         | 1.28  | 0.327 | 1.2   | 0.541 |
| IL-5 (pg/ml)  | mean | 0.94  | 0.581  | 0.974 | 0.808         | 1.01  | 0.653         | 1.02  | 0.405 | 0.998 | 0.872 |
|               | log  | 0.76  | 0.49   | 0.906 | 0.83          | 0.773 | 0.459         | 1.45  | 0.307 | 1.35  | 0.432 |
|               | max  | 1.12  | 0.1    | 1.2   | <b>0.0209</b> | 0.963 | 0.471         | 0.949 | 0.491 | 0.958 | 0.656 |
| IL-6 (pg/ml)  | log  | 1.7   | 0.171  | 4.91  | <b>0.015</b>  | 0.848 | 0.673         | 1.01  | 0.973 | 1.04  | 0.941 |
|               | mean | 1.21  | 0.306  | 1.39  | 0.0918        | 0.889 | 0.503         | 0.793 | 0.427 | 0.84  | 0.617 |
|               | log  | 2.21  | 0.201  | 6.13  | <b>0.0309</b> | 0.758 | 0.652         | 0.764 | 0.706 | 0.821 | 0.824 |
| IL-7 (pg/ml)  | max  | 1     | 0.408  | 1     | 0.317         | 1     | 0.319         | 1     | 0.735 | 1     | 0.893 |
|               | log  | 0.939 | 0.806  | 1.59  | 0.216         | 0.852 | 0.574         | 1.33  | 0.37  | 1.31  | 0.493 |
|               | mean | 1     | 0.421  | 1     | 0.192         | 0.999 | 0.327         | 1     | 0.784 | 1     | 0.987 |
| IL-8 (pg/ml)  | log  | 0.964 | 0.912  | 1.62  | 0.286         | 0.825 | 0.6           | 1.48  | 0.347 | 1.56  | 0.393 |
|               | max  | 1     | 0.978  | 1.01  | 0.292         | 0.992 | 0.442         | 0.972 | 0.158 | 0.999 | 0.927 |
|               | log  | 1.13  | 0.694  | 1.71  | 0.286         | 0.889 | 0.725         | 0.833 | 0.585 | 0.931 | 0.883 |
| IL-10 (pg/ml) | mean | 1     | 0.988  | 1.02  | 0.402         | 0.999 | 0.957         | 0.944 | 0.209 | 0.996 | 0.905 |
|               | log  | 1.17  | 0.666  | 1.55  | 0.391         | 0.891 | 0.764         | 0.694 | 0.36  | 0.952 | 0.93  |
|               | max  | 1     | 0.369  | 1     | 0.133         | 1     | 0.0846        | 1     | 0.58  | 0.999 | 0.53  |
| IL-12 (pg/ml) | log  | 1.8   | 0.15   | 2.71  | 0.0582        | 4.29  | <b>0.0321</b> | 1.26  | 0.59  | 0.874 | 0.821 |
|               | mean | 1     | 0.21   | 1     | 0.519         | 1.03  | <b>0.0186</b> | 1     | 0.915 | 0.999 | 0.727 |
|               | log  | 2.63  | 0.0759 | 1.97  | 0.254         | 11.8  | <b>0.013</b>  | 1.38  | 0.55  | 0.916 | 0.903 |
| IL-13 (pg/ml) | max  | 1.02  | 0.203  | 0.999 | 0.784         | 1     | 0.642         | 0.978 | 0.434 | 0.998 | 0.788 |
|               | log  | 1.31  | 0.243  | 1.5   | 0.135         | 1.06  | 0.817         | 0.773 | 0.369 | 1.14  | 0.671 |
|               | mean | 1.07  | 0.34   | 0.997 | 0.777         | 1.01  | 0.63          | 0.971 | 0.692 | 0.991 | 0.778 |
| IL-13 (pg/ml) | log  | 1.63  | 0.178  | 1.24  | 0.514         | 1.12  | 0.737         | 0.767 | 0.536 | 1.17  | 0.683 |
|               | max  | 0.999 | 0.761  | 1     | 0.619         | 0.993 | 0.304         | 0.938 | 0.477 | 1.01  | 0.169 |
|               | log  | 1.18  | 0.525  | 1.75  | 0.0784        | 0.843 | 0.536         | 0.684 | 0.323 | 1.44  | 0.277 |
| IL-13 (pg/ml) | mean | 0.993 | 0.805  | 1.01  | 0.659         | 0.928 | 0.274         | 0.84  | 0.483 | 1.06  | 0.139 |
|               | log  | 1.35  | 0.462  | 1.76  | 0.203         | 0.688 | 0.372         | 0.497 | 0.313 | 1.83  | 0.207 |
|               | max  | 1     | 0.897  | 1.02  | 0.504         | 0.994 | 0.863         | 0.765 | 0.283 | 0.983 | 0.762 |
| IL-13 (pg/ml) | log  | 1.04  | 0.901  | 1.36  | 0.441         | 0.762 | 0.451         | 0.403 | 0.158 | 1.04  | 0.945 |
|               | mean | 0.952 | 0.558  | 0.928 | 0.671         | 1.03  | 0.749         | 0.637 | 0.302 | 0.836 | 0.67  |

|                      |      |       |        |       |               |       |       |       |       |       |        |
|----------------------|------|-------|--------|-------|---------------|-------|-------|-------|-------|-------|--------|
| IL-17 (pg/ml)        | log  | 0.969 | 0.949  | 0.94  | 0.922         | 0.89  | 0.822 | 0.263 | 0.194 | 0.649 | 0.639  |
|                      | max  | 1.02  | 0.203  | 0.999 | 0.784         | 1     | 0.642 | 0.978 | 0.434 | 0.998 | 0.788  |
|                      | log  | 1.31  | 0.243  | 1.5   | 0.135         | 1.06  | 0.817 | 0.773 | 0.369 | 1.14  | 0.671  |
| GM-CSF (pg/ml)       | mean | 1.07  | 0.34   | 0.997 | 0.777         | 1.01  | 0.63  | 0.971 | 0.692 | 0.991 | 0.778  |
|                      | log  | 1.63  | 0.178  | 1.24  | 0.514         | 1.12  | 0.737 | 0.767 | 0.536 | 1.17  | 0.683  |
|                      | max  | 1     | 0.645  | 1.01  | 0.235         | 1     | 0.866 | 1     | 0.886 | 0.997 | 0.818  |
| INF $\gamma$ (pg/ml) | log  | 1.09  | 0.72   | 1.09  | 0.797         | 1.01  | 0.96  | 1.01  | 0.965 | 1.16  | 0.713  |
|                      | mean | 1.02  | 0.595  | 1.01  | 0.838         | 1.01  | 0.691 | 1.01  | 0.767 | 0.969 | 0.548  |
|                      | log  | 1.29  | 0.43   | 0.961 | 0.918         | 1.19  | 0.624 | 0.958 | 0.91  | 1.04  | 0.933  |
| TNF $\alpha$ (pg/ml) | max  | 1     | 0.232  | 1.01  | 0.0891        | 0.997 | 0.226 | 0.995 | 0.319 | 0.997 | 0.541  |
|                      | log  | 1.17  | 0.445  | 1.65  | 0.118         | 0.882 | 0.572 | 1.02  | 0.936 | 0.817 | 0.5    |
|                      | mean | 1.02  | 0.19   | 1.01  | 0.235         | 0.99  | 0.287 | 0.99  | 0.546 | 0.964 | 0.32   |
| G-CSF (pg/ml)        | log  | 1.38  | 0.227  | 1.48  | 0.248         | 0.908 | 0.726 | 1.02  | 0.945 | 0.707 | 0.389  |
|                      | max  | 1     | 0.292  | 1.01  | 0.116         | 0.994 | 0.167 | 0.993 | 0.445 | 0.951 | 0.29   |
|                      | log  | 1.29  | 0.265  | 1.57  | 0.117         | 0.745 | 0.226 | 0.851 | 0.544 | 0.503 | 0.166  |
| MCP-1 (pg/ml)        | mean | 1.05  | 0.249  | 1.04  | 0.378         | 0.966 | 0.366 | 0.99  | 0.65  | 0.809 | 0.236  |
|                      | log  | 1.86  | 0.0669 | 1.91  | 0.0911        | 0.702 | 0.263 | 0.834 | 0.608 | 0.396 | 0.174  |
|                      | max  | 1     | 0.262  | 1     | 0.0541        | 1     | 0.861 | 1     | 0.869 | 1     | 0.718  |
| MIP-1b (pg/ml)       | log  | 1.48  | 0.179  | 3.48  | <b>0.0244</b> | 0.99  | 0.972 | 0.903 | 0.738 | 1.19  | 0.668  |
|                      | mean | 1     | 0.123  | 1     | <b>0.0312</b> | 1     | 0.762 | 0.999 | 0.64  | 1     | 0.89   |
|                      | log  | 1.85  | 0.0888 | 3.36  | <b>0.0431</b> | 1.02  | 0.949 | 0.814 | 0.561 | 1.22  | 0.69   |
| MCP-1 (pg/ml)        | max  | 1     | 0.745  | 1     | 0.0589        | 1     | 0.704 | 0.999 | 0.213 | 1     | 0.108  |
|                      | log  | 1.27  | 0.546  | 3.09  | 0.0571        | 0.936 | 0.874 | 0.628 | 0.328 | 2.81  | 0.132  |
|                      | mean | 1     | 0.876  | 1     | 0.27          | 1     | 0.81  | 0.995 | 0.159 | 1     | 0.0977 |
| MIP-1b (pg/ml)       | log  | 1.22  | 0.634  | 1.64  | 0.351         | 1.01  | 0.981 | 0.541 | 0.252 | 2.69  | 0.156  |
|                      | max  | 0.998 | 0.551  | 1     | 0.451         | 0.999 | 0.699 | 0.997 | 0.339 | 0.99  | 0.165  |
|                      | log  | 0.832 | 0.655  | 1.63  | 0.397         | 0.84  | 0.7   | 0.96  | 0.931 | 0.446 | 0.237  |
|                      | mean | 1     | 0.986  | 1.01  | 0.449         | 1     | 0.864 | 0.999 | 0.87  | 0.974 | 0.12   |
|                      | log  | 1.04  | 0.938  | 1.7   | 0.435         | 1.04  | 0.936 | 1.13  | 0.833 | 0.231 | 0.126  |

EF = ejection fraction. E/e' = ratio of E-wave to e'. avcIB = average calibrated integrated backscatter of septal and posterior LV wall. NEPI = norepinephrine. EPI = epinephrine. DOPA = dopamine. OR = odds ratio.

**Supplemental table 2b: Logistic regression of biomarkers during acute hospitalization**



| Long-term parameters                         |      | Linear regression |               |          |         |          |                |
|----------------------------------------------|------|-------------------|---------------|----------|---------|----------|----------------|
|                                              |      | EF                |               | E/e'     |         | avcIB    |                |
|                                              |      | slope             | p value       | slope    | p value | slope    | p value        |
| Cortisol ( $\mu\text{g}/24\text{h}$ , Urine) | max  | -0.0102           | 0.426         | -0.00346 | 0.427   | -0.00165 | 0.855          |
|                                              | log  | -2.19             | 0.326         | -0.505   | 0.509   | 0.587    | 0.71           |
|                                              | mean | -0.00619          | 0.811         | 0.00161  | 0.855   | 0.0194   | 0.278          |
|                                              | log  | -1.9              | 0.473         | -0.0518  | 0.954   | 2.37     | 0.195          |
| Cortisol (pg/ml, Serum)                      | max  | -0.0767           | 0.115         | -0.00433 | 0.869   | 0.0123   | 0.838          |
|                                              | log  | -5.04             | 0.143         | -0.0359  | 0.985   | 1.58     | 0.706          |
|                                              | mean | -0.0845           | 0.063         | -0.00285 | 0.909   | 0.00434  | 0.939          |
|                                              | log  | -6.49             | <b>0.0257</b> | 0.0632   | 0.969   | 0.405    | 0.914          |
| NEPI ( $\mu\text{g}/24\text{h}$ , Urine)     | max  | -0.0158           | 0.578         | -0.0088  | 0.409   | -0.0254  | 0.303          |
|                                              | log  | -1.69             | 0.237         | -0.65    | 0.229   | -1.04    | 0.408          |
|                                              | mean | -0.0407           | 0.611         | -0.0266  | 0.377   | -0.0348  | 0.62           |
|                                              | log  | -1.85             | 0.289         | -0.841   | 0.198   | -0.719   | 0.641          |
| EPI ( $\mu\text{g}/24\text{h}$ , Urine)      | max  | -0.0203           | 0.212         | -0.00793 | 0.197   | -0.0103  | 0.475          |
|                                              | log  | -0.825            | 0.54          | -1.03    | 0.0352  | -0.979   | 0.405          |
|                                              | mean | -0.0695           | 0.33          | -0.0319  | 0.233   | -0.0461  | 0.465          |
|                                              | log  | -0.933            | 0.6           | -1.21    | 0.0621  | -0.828   | 0.597          |
| DOPA ( $\mu\text{g}/24\text{h}$ , Urine)     | max  | -0.00418          | 0.52          | -0.00206 | 0.398   | -0.00364 | 0.519          |
|                                              | log  | -2.04             | 0.262         | -0.972   | 0.153   | -1.11    | 0.485          |
|                                              | mean | -0.00759          | 0.513         | -0.00432 | 0.321   | -0.00724 | 0.475          |
|                                              | log  | -2.17             | 0.285         | -0.994   | 0.192   | -0.857   | 0.634          |
| IL-1 $\beta$ (pg/ml)                         | max  | -0.0182           | 0.102         | 0.00347  | 0.374   | 0.00627  | 0.504          |
|                                              | log  | -1.09             | 0.274         | 0.265    | 0.441   | 0.567    | 0.49           |
|                                              | mean | -0.105            | 0.147         | 0.0222   | 0.378   | 0.0384   | 0.527          |
|                                              | log  | -1.24             | 0.414         | 0.439    | 0.399   | 0.773    | 0.534          |
| IL-2 (pg/ml)                                 | max  | 0.0162            | 0.514         | 0.011    | 0.193   | 0.0449   | <b>0.0148</b>  |
|                                              | log  | 0.555             | 0.618         | 0.362    | 0.341   | 2.03     | <b>0.014</b>   |
|                                              | mean | 0.0991            | 0.398         | 0.0515   | 0.197   | 0.201    | <b>0.00127</b> |

|               |      |          |        |          |       |          |                |
|---------------|------|----------|--------|----------|-------|----------|----------------|
|               | log  | 1.6      | 0.318  | 0.534    | 0.332 | 3.06     | <b>0.00547</b> |
| IL-4 (pg/ml)  | max  | 0.106    | 0.0791 | 0.000732 | 0.973 | 0.0144   | 0.779          |
|               | log  | 1.56     | 0.275  | 0.191    | 0.7   | 1.39     | 0.229          |
|               | mean | 0.175    | 0.0451 | -0.0115  | 0.714 | -0.0184  | 0.806          |
|               | log  | 2.62     | 0.121  | 0.00254  | 0.997 | 1.16     | 0.394          |
| IL-5 (pg/ml)  | max  | -0.22    | 0.236  | 0.0472   | 0.464 | 0.0763   | 0.623          |
|               | log  | -1.25    | 0.515  | 0.291    | 0.661 | 0.793    | 0.621          |
|               | mean | -0.351   | 0.634  | 0.112    | 0.657 | 0.149    | 0.807          |
|               | log  | -1.87    | 0.526  | 0.425    | 0.676 | 1.05     | 0.667          |
| IL-6 (pg/ml)  | max  | -0.0075  | 0.346  | -0.00173 | 0.531 | -0.00332 | 0.617          |
|               | log  | -0.717   | 0.509  | -0.23    | 0.538 | 0.443    | 0.622          |
|               | mean | 0.000273 | 0.989  | -0.00945 | 0.159 | -0.0124  | 0.448          |
|               | log  | -0.871   | 0.549  | -0.379   | 0.448 | 0.542    | 0.649          |
| IL-7 (pg/ml)  | max  | -0.066   | 0.17   | 0.014    | 0.402 | 0.0306   | 0.448          |
|               | log  | -1.77    | 0.257  | 0.414    | 0.445 | 1.41     | 0.277          |
|               | mean | -0.192   | 0.293  | 0.0476   | 0.452 | 0.11     | 0.472          |
|               | log  | -1.94    | 0.321  | 0.434    | 0.523 | 1.62     | 0.321          |
| IL-8 (pg/ml)  | max  | -0.0108  | 0.312  | 0.00269  | 0.466 | -0.0017  | 0.847          |
|               | log  | -0.201   | 0.869  | 0.0498   | 0.905 | -1.24    | 0.196          |
|               | mean | 0.0392   | 0.424  | 0.000814 | 0.962 | -0.0521  | 0.186          |
|               | log  | 0.481    | 0.745  | 0.0294   | 0.954 | -1.95    | 0.0916         |
| IL-10 (pg/ml) | max  | 0.00617  | 0.871  | 0.000891 | 0.946 | 0.0123   | 0.694          |
|               | log  | 0.517    | 0.662  | 0.275    | 0.498 | 1.18     | 0.232          |
|               | mean | 0.13     | 0.413  | -0.00388 | 0.944 | 0.039    | 0.768          |
|               | log  | 1.65     | 0.33   | 0.432    | 0.46  | 1.71     | 0.224          |
| IL-12 (pg/ml) | max  | -0.0299  | 0.56   | 0.00603  | 0.733 | 0.0366   | 0.386          |
|               | log  | 0.194    | 0.885  | -0.03    | 0.948 | 1.12     | 0.322          |
|               | mean | -0.00904 | 0.972  | 0.0259   | 0.767 | 0.125    | 0.554          |
|               | log  | 0.825    | 0.688  | 0.0393   | 0.956 | 1.4      | 0.417          |
| IL-13 (pg/ml) | max  | 0.204    | 0.147  | -0.00994 | 0.84  | -0.0573  | 0.628          |
|               | log  | 0.565    | 0.769  | 0.2      | 0.762 | -0.474   | 0.764          |
|               | mean | 0.267    | 0.0774 | -0.016   | 0.766 | -0.0738  | 0.565          |

|                      |      |            |       |           |       |           |                 |
|----------------------|------|------------|-------|-----------|-------|-----------|-----------------|
| IL-17 (pg/ml)        | log  | 1.82       | 0.42  | 0.347     | 0.656 | -0.711    | 0.702           |
|                      | max  | 0.00617    | 0.871 | 0.000891  | 0.946 | 0.0123    | 0.694           |
|                      | log  | 0.517      | 0.662 | 0.275     | 0.498 | 1.18      | 0.232           |
| GM-CSF (pg/ml)       | mean | 0.13       | 0.413 | -0.00388  | 0.944 | 0.039     | 0.768           |
|                      | log  | 1.65       | 0.33  | 0.432     | 0.46  | 1.71      | 0.224           |
|                      | max  | -0.00523   | 0.73  | 0.00684   | 0.182 | 0.0266    | <b>0.024</b>    |
| INF $\gamma$ (pg/ml) | log  | -0.7       | 0.575 | 0.602     | 0.154 | 2.77      | <b>0.00503</b>  |
|                      | mean | 0.0152     | 0.872 | 0.0436    | 0.172 | 0.192     | <b>0.000597</b> |
|                      | log  | 0.218      | 0.9   | 0.872     | 0.135 | 3.6       | <b>0.00516</b>  |
| TNF $\alpha$ (pg/ml) | max  | -0.0000421 | 0.998 | 0.00516   | 0.295 | 0.00757   | 0.526           |
|                      | log  | 0.129      | 0.897 | 0.153     | 0.653 | 0.386     | 0.637           |
|                      | mean | 0.0367     | 0.487 | 0.0179    | 0.323 | 0.037     | 0.395           |
| G-CSF (pg/ml)        | log  | 0.679      | 0.619 | 0.267     | 0.57  | 0.788     | 0.482           |
|                      | max  | -0.0234    | 0.151 | 0.00468   | 0.41  | 0.00948   | 0.488           |
|                      | log  | -0.852     | 0.456 | 0.365     | 0.352 | 0.634     | 0.496           |
| MCP-1 (pg/ml)        | mean | -0.103     | 0.265 | 0.0268    | 0.403 | 0.0591    | 0.443           |
|                      | log  | -0.494     | 0.761 | 0.564     | 0.308 | 0.813     | 0.538           |
|                      | max  | -0.00651   | 0.433 | 0.00154   | 0.592 | 0.00231   | 0.737           |
| MIP-1b (pg/ml)       | log  | 0.315      | 0.79  | -0.227    | 0.575 | -0.101    | 0.917           |
|                      | mean | 0.0225     | 0.581 | 0.00263   | 0.851 | -0.00114  | 0.973           |
|                      | log  | 1.61       | 0.288 | -0.469    | 0.369 | -0.626    | 0.621           |
| MCP-1 (pg/ml)        | max  | -0.00359   | 0.486 | 0.000628  | 0.724 | 0.0000448 | 0.992           |
|                      | log  | -1.06      | 0.598 | 0.266     | 0.701 | -1.15     | 0.476           |
|                      | mean | 0.000331   | 0.958 | 0.0000298 | 0.989 | -0.00194  | 0.704           |
| MIP-1b (pg/ml)       | log  | -0.0474    | 0.98  | 0.117     | 0.854 | -1.47     | 0.325           |
|                      | max  | -0.0185    | 0.267 | -0.00234  | 0.686 | -0.00963  | 0.487           |
|                      | log  | -2.24      | 0.416 | -0.364    | 0.703 | -1.23     | 0.59            |
| MIP-1b (pg/ml)       | mean | -0.0232    | 0.527 | -0.00247  | 0.845 | -0.0302   | 0.312           |
|                      | log  | -1.71      | 0.638 | -0.346    | 0.782 | -2.53     | 0.391           |

EF = ejection fraction. E/e' = ratio of E-wave to e'. avcIB = average calibrated integrated backscatter of septal and posterior LV wall. NEPI = norepinephrine. EPI = epinephrine. DOPA = dopamine. OR = odds ratio.

**Supplemental table 3a: Linear regression of biomarkers between discharge from acute hospitalization and study date**

| Long-term parameters     |      | Logistic regression |         |          |         |          |         |           |         |             |         |
|--------------------------|------|---------------------|---------|----------|---------|----------|---------|-----------|---------|-------------|---------|
|                          |      | EF < 50%            |         | EF < 40% |         | E/e' > 8 |         | E/e' ≥ 12 |         | avcIB > -15 |         |
|                          |      | OR                  | p value | OR       | p value | OR       | p value | OR        | p value | OR          | p value |
| Cortisol (µg/24h, Urine) | max  | 1                   | 0.444   | 1        | 0.224   | 0.998    | 0.414   | 0.997     | 0.359   | 0.999       | 0.84    |
|                          | log  | 1.34                | 0.55    | 1.43     | 0.55    | 0.546    | 0.368   | 0.688     | 0.436   | 1.05        | 0.942   |
|                          | mean | 1                   | 0.695   | 1        | 0.431   | 0.996    | 0.434   | 0.999     | 0.882   | 1           | 0.619   |
|                          | log  | 1.37                | 0.576   | 1.32     | 0.667   | 0.619    | 0.482   | 0.785     | 0.67    | 2.08        | 0.408   |
| Cortisol (pg/ml, Serum)  | max  | 1.04                | 0.21    | 1.02     | 0.204   | 0.986    | 0.342   | 1         | 0.918   | 0.983       | 0.559   |
|                          | log  | 5.66                | 0.148   | 11       | 0.151   | 0.343    | 0.28    | 1.42      | 0.697   | 0.573       | 0.639   |
|                          | mean | 1.14                | 0.288   | 1.02     | 0.189   | 0.989    | 0.385   | 1         | 0.972   | 0.971       | 0.576   |
|                          | log  | 38.8                | 0.173   | 8.75     | 0.147   | 0.481    | 0.372   | 0.984     | 0.984   | 0.41        | 0.519   |
| NEPI (µg/24h, Urine)     | max  | 0.999               | 0.847   | 0.998    | 0.778   | 0.993    | 0.284   | 0.999     | 0.895   | 1           | 0.961   |
|                          | log  | 1.32                | 0.413   | 1.2      | 0.665   | 0.707    | 0.348   | 0.941     | 0.863   | 1.45        | 0.428   |
|                          | mean | 0.994               | 0.729   | 0.996    | 0.863   | 0.988    | 0.518   | 0.997     | 0.887   | 1.01        | 0.514   |
|                          | log  | 1.28                | 0.539   | 1.27     | 0.639   | 0.698    | 0.416   | 0.864     | 0.733   | 2           | 0.273   |
| EPI (µg/24h, Urine)      | max  | 1                   | 0.371   | 1.01     | 0.221   | 0.996    | 0.32    | 0.978     | 0.266   | 0.994       | 0.653   |
|                          | log  | 1.17                | 0.604   | 1.41     | 0.383   | 0.827    | 0.559   | 0.547     | 0.123   | 1.12        | 0.776   |
|                          | mean | 1.02                | 0.395   | 1.03     | 0.165   | 0.987    | 0.44    | 0.962     | 0.345   | 0.994       | 0.817   |
|                          | log  | 1.21                | 0.632   | 1.5      | 0.436   | 0.889    | 0.781   | 0.506     | 0.169   | 1.46        | 0.498   |
| DOPA (µg/24h, Urine)     | max  | 1                   | 0.572   | 1        | 0.58    | 0.999    | 0.473   | 0.999     | 0.72    | 1           | 0.919   |
|                          | log  | 1.43                | 0.426   | 1.83     | 0.343   | 0.62     | 0.346   | 0.651     | 0.337   | 1.4         | 0.588   |
|                          | mean | 1                   | 0.602   | 1        | 0.388   | 0.998    | 0.381   | 0.998     | 0.533   | 1           | 0.996   |
|                          | log  | 1.4                 | 0.487   | 2.1      | 0.294   | 0.636    | 0.402   | 0.612     | 0.33    | 1.49        | 0.561   |
| IL-1β (pg/ml)            | max  | 1.01                | 0.426   | 1.01     | 0.319   | 1.09     | 0.303   | 1.01      | 0.328   | 0.986       | 0.566   |
|                          | log  | 1.1                 | 0.654   | 1.45     | 0.128   | 1.62     | 0.116   | 1.49      | 0.103   | 0.892       | 0.721   |
|                          | mean | 1.03                | 0.451   | 1.04     | 0.298   | 1.35     | 0.318   | 1.06      | 0.297   | 0.907       | 0.524   |
|                          | log  | 1.16                | 0.645   | 1.65     | 0.159   | 2.81     | 0.106   | 1.87      | 0.0914  | 0.726       | 0.573   |
| IL-2 (pg/ml)             | max  | 0.994               | 0.376   | 0.999    | 0.858   | 1.01     | 0.282   | 1.02      | 0.0787  | 1           | 0.488   |
|                          | log  | 0.872               | 0.56    | 0.994    | 0.984   | 1.42     | 0.211   | 1.75      | 0.0576  | 1.26        | 0.437   |
|                          | mean | 0.971               | 0.369   | 0.993    | 0.825   | 1.12     | 0.247   | 1.08      | 0.109   | 1.03        | 0.176   |

|               |      |       |       |       |       |       |       |       |        |       |       |
|---------------|------|-------|-------|-------|-------|-------|-------|-------|--------|-------|-------|
| IL-4 (pg/ml)  | log  | 0.778 | 0.465 | 0.821 | 0.65  | 1.82  | 0.168 | 2.1   | 0.0732 | 1.45  | 0.338 |
|               | max  | 0.992 | 0.557 | 0.973 | 0.584 | 1.05  | 0.441 | 1     | 0.746  | 1.01  | 0.504 |
|               | log  | 0.892 | 0.704 | 0.763 | 0.522 | 1.71  | 0.187 | 1.4   | 0.317  | 1.61  | 0.207 |
| IL-5 (pg/ml)  | mean | 0.975 | 0.469 | 0.785 | 0.409 | 1.08  | 0.572 | 0.984 | 0.697  | 1     | 0.99  |
|               | log  | 0.868 | 0.698 | 0.502 | 0.36  | 1.74  | 0.292 | 1.07  | 0.876  | 1.55  | 0.283 |
|               | max  | 1.04  | 0.473 | 1.1   | 0.231 | 1.32  | 0.129 | 1.08  | 0.218  | 0.888 | 0.528 |
| IL-6 (pg/ml)  | log  | 1.05  | 0.901 | 1.98  | 0.163 | 2.18  | 0.137 | 1.76  | 0.233  | 0.698 | 0.577 |
|               | mean | 1.09  | 0.608 | 1.29  | 0.139 | 2.18  | 0.184 | 1.19  | 0.287  | 0.731 | 0.53  |
|               | log  | 1.35  | 0.628 | 2.93  | 0.135 | 4.2   | 0.123 | 1.93  | 0.341  | 0.498 | 0.522 |
| IL-7 (pg/ml)  | max  | 1     | 0.8   | 1     | 0.501 | 0.998 | 0.295 | 1     | 0.242  | 0.997 | 0.478 |
|               | log  | 0.888 | 0.603 | 1.11  | 0.691 | 0.864 | 0.532 | 1.41  | 0.221  | 0.99  | 0.974 |
|               | mean | 0.995 | 0.374 | 0.998 | 0.791 | 0.992 | 0.253 | 1     | 0.901  | 0.995 | 0.666 |
| IL-8 (pg/ml)  | log  | 0.866 | 0.638 | 1.06  | 0.88  | 0.821 | 0.531 | 1.45  | 0.306  | 1.07  | 0.875 |
|               | max  | 1.01  | 0.544 | 1.02  | 0.162 | 1.03  | 0.193 | 1.02  | 0.175  | 0.97  | 0.42  |
|               | log  | 1.07  | 0.842 | 1.84  | 0.194 | 1.7   | 0.155 | 1.8   | 0.205  | 0.875 | 0.771 |
| IL-10 (pg/ml) | mean | 1.01  | 0.711 | 1.07  | 0.139 | 1.09  | 0.104 | 1.06  | 0.227  | 0.911 | 0.264 |
|               | log  | 1.08  | 0.848 | 1.91  | 0.261 | 1.97  | 0.137 | 1.71  | 0.332  | 0.711 | 0.549 |
|               | max  | 1     | 0.59  | 1     | 0.238 | 1     | 0.507 | 1     | 0.133  | 0.985 | 0.221 |
| IL-12 (pg/ml) | log  | 0.931 | 0.778 | 1.29  | 0.446 | 1.11  | 0.682 | 1.08  | 0.796  | 0.561 | 0.129 |
|               | mean | 0.995 | 0.643 | 1     | 0.839 | 1     | 0.679 | 1.01  | 0.633  | 0.971 | 0.209 |
|               | log  | 0.906 | 0.75  | 1.11  | 0.786 | 1.16  | 0.64  | 0.974 | 0.942  | 0.496 | 0.123 |
| IL-13 (pg/ml) | max  | 0.994 | 0.491 | 1.01  | 0.447 | 0.994 | 0.435 | 1.01  | 0.493  | 0.985 | 0.544 |
|               | log  | 0.752 | 0.27  | 1.32  | 0.351 | 1.01  | 0.963 | 1.36  | 0.303  | 1.09  | 0.798 |
|               | mean | 0.961 | 0.326 | 1     | 0.995 | 0.961 | 0.281 | 1.01  | 0.724  | 0.971 | 0.664 |
| IL-13 (pg/ml) | log  | 0.673 | 0.293 | 1.13  | 0.767 | 0.975 | 0.945 | 1.5   | 0.323  | 1.21  | 0.699 |
|               | max  | 0.998 | 0.858 | 1.01  | 0.3   | 1.01  | 0.61  | 1.01  | 0.229  | 0.977 | 0.579 |
|               | log  | 0.735 | 0.294 | 1.1   | 0.766 | 1.08  | 0.803 | 1.38  | 0.344  | 1.03  | 0.942 |
| IL-13 (pg/ml) | mean | 0.988 | 0.814 | 1.06  | 0.34  | 1.05  | 0.49  | 1.06  | 0.278  | 0.89  | 0.515 |
|               | log  | 0.717 | 0.45  | 1.12  | 0.817 | 1.34  | 0.523 | 1.38  | 0.519  | 0.876 | 0.833 |
|               | max  | 0.974 | 0.48  | 0.994 | 0.884 | 1.09  | 0.396 | 0.997 | 0.942  | 0.962 | 0.681 |
| IL-13 (pg/ml) | log  | 0.927 | 0.85  | 1.2   | 0.697 | 1.8   | 0.238 | 1.29  | 0.574  | 0.687 | 0.566 |
|               | mean | 0.962 | 0.474 | 0.964 | 0.685 | 2.39  | 0.158 | 0.96  | 0.687  | 0.779 | 0.635 |

|                      |      |       |       |       |       |       |       |       |        |        |               |
|----------------------|------|-------|-------|-------|-------|-------|-------|-------|--------|--------|---------------|
| IL-17 (pg/ml)        | log  | 0.936 | 0.889 | 0.988 | 0.983 | 7.21  | 0.102 | 0.991 | 0.987  | 0.514  | 0.546         |
|                      | max  | 0.994 | 0.491 | 1.01  | 0.447 | 0.994 | 0.435 | 1.01  | 0.493  | 0.985  | 0.544         |
|                      | log  | 0.752 | 0.27  | 1.32  | 0.351 | 1.01  | 0.963 | 1.36  | 0.303  | 1.09   | 0.798         |
| GM-CSF (pg/ml)       | mean | 0.961 | 0.326 | 1     | 0.995 | 0.961 | 0.281 | 1.01  | 0.724  | 0.971  | 0.664         |
|                      | log  | 0.673 | 0.293 | 1.13  | 0.767 | 0.975 | 0.945 | 1.5   | 0.323  | 1.21   | 0.699         |
|                      | max  | 1     | 0.46  | 0.999 | 0.869 | 1.02  | 0.218 | 1.03  | 0.0984 | 1.01   | 0.254         |
| INF $\gamma$ (pg/ml) | log  | 1.17  | 0.561 | 1.34  | 0.381 | 1.67  | 0.104 | 2.04  | 0.0925 | 2.05   | 0.131         |
|                      | mean | 1.01  | 0.526 | 0.972 | 0.509 | 1.04  | 0.344 | 1.04  | 0.165  | 1.05   | <b>0.0424</b> |
|                      | log  | 1.22  | 0.589 | 0.981 | 0.965 | 1.98  | 0.119 | 2     | 0.163  | 2.65   | 0.0907        |
| TNF $\alpha$ (pg/ml) | max  | 0.997 | 0.435 | 1     | 0.465 | 1     | 0.413 | 1.01  | 0.0702 | 0.997  | 0.587         |
|                      | log  | 0.801 | 0.302 | 1.09  | 0.72  | 1.17  | 0.478 | 1.38  | 0.254  | 0.997  | 0.993         |
|                      | mean | 0.982 | 0.252 | 1     | 0.932 | 1.01  | 0.42  | 1.02  | 0.109  | 0.985  | 0.577         |
| G-CSF (pg/ml)        | log  | 0.716 | 0.267 | 1.01  | 0.974 | 1.33  | 0.348 | 1.52  | 0.262  | 0.954  | 0.906         |
|                      | max  | 1     | 0.487 | 1.01  | 0.298 | 1.01  | 0.536 | 1.01  | 0.382  | 0.986  | 0.554         |
|                      | log  | 1.02  | 0.944 | 1.34  | 0.318 | 1.24  | 0.395 | 1.7   | 0.112  | 0.843  | 0.618         |
| MCP-1 (pg/ml)        | mean | 1.01  | 0.574 | 1.03  | 0.227 | 1.06  | 0.382 | 1.04  | 0.219  | 0.855  | 0.266         |
|                      | log  | 0.993 | 0.984 | 1.25  | 0.58  | 1.53  | 0.261 | 1.81  | 0.184  | 0.619  | 0.349         |
|                      | max  | 1     | 0.875 | 1     | 0.224 | 1     | 0.837 | 1     | 0.184  | 0.998  | 0.598         |
| MIP-1b (pg/ml)       | log  | 0.693 | 0.197 | 1.13  | 0.701 | 0.946 | 0.829 | 1.18  | 0.611  | 1.15   | 0.712         |
|                      | mean | 0.989 | 0.262 | 1     | 0.826 | 0.996 | 0.661 | 1.01  | 0.249  | 0.987  | 0.476         |
|                      | log  | 0.517 | 0.113 | 0.832 | 0.613 | 0.828 | 0.586 | 1.04  | 0.923  | 1.02   | 0.957         |
| DOPA (pg/ml)         | max  | 1     | 0.448 | 1     | 0.109 | 1     | 0.432 | 1     | 0.831  | 1      | 0.846         |
|                      | log  | 1.38  | 0.447 | 2.31  | 0.175 | 1.36  | 0.487 | 0.806 | 0.667  | 0.449  | 0.199         |
|                      | mean | 1     | 0.619 | 1     | 0.426 | 1     | 0.726 | 0.997 | 0.327  | 1      | 0.474         |
| EPI (pg/ml)          | log  | 1.37  | 0.425 | 1.39  | 0.485 | 1.18  | 0.683 | 0.607 | 0.314  | 0.519  | 0.282         |
|                      | max  | 0.998 | 0.575 | 1.01  | 0.192 | 0.998 | 0.591 | 1     | 0.91   | 0.981  | 0.139         |
|                      | log  | 0.628 | 0.433 | 2.02  | 0.345 | 0.82  | 0.741 | 1.19  | 0.8    | 0.241  | 0.131         |
| OR                   | mean | 0.993 | 0.385 | 1.01  | 0.488 | 0.999 | 0.873 | 1     | 0.803  | 0.956  | 0.0863        |
|                      | log  | 0.471 | 0.338 | 1.47  | 0.678 | 0.903 | 0.896 | 1.17  | 0.866  | 0.0819 | 0.0666        |

EF = ejection fraction. E/e' = ratio of E-wave to e'. avcIB = average calibrated integrated backscatter of septal and posterior LV wall. NEPI = norepinephrine. EPI = epinephrine. DOPA = dopamine. OR = odds ratio.

**Supplemental table 3b: Logistic regression of biomarkers between discharge from acute hospitalization and study date**
